# Supplementary material for: Hyper-crosslinked aromatic polymers with improved microporosity for enhanced CO2/N2 and CO2/CH4 selectivity
Source: Royal Society of Chemistry journal article supplement (doi:10.1039/c7nj00919d), 2017-01-01
Supplement: c7nj00919d1.pdf [file c7nj00919d1.pdf]

Supporting Information for

## Hyper-Crosslinked Aromatic Polymers with Improved Microporosity for Enhanced CO<sub>2</sub>/N<sub>2</sub> and CO<sub>2</sub>/CH<sub>4</sub> Selectivity †

Dongyang Chen,<sup>[a]</sup> Shuai Gu,<sup>[a]</sup> Yu Fu,<sup>[a]</sup> Xianbiao Fu,<sup>[a]</sup> Yindong Zhang,<sup>[a]</sup> Guipeng Yu,<sup>\*[a]</sup> Chunyue Pan<sup>[a]</sup>

### Content

|                                                           |   |
|-----------------------------------------------------------|---|
| 1. FT-IR spectra of NOPs.....                             | 2 |
| 2. Elemental analysis.....                                | 2 |
| 3. Powder X-ray diffraction patterns of NOPs.....         | 3 |
| 4. Morphology analysis of NOP-47 .....                    | 4 |
| 5. TGA curves of NOPs .....                               | 4 |
| 6. High-pressure methane adsorption curves for NOPs ..... | 5 |
| 7. Selective gas adsorption for NOPs.....                 | 6 |

## 1. FT-IR spectra of NOPs

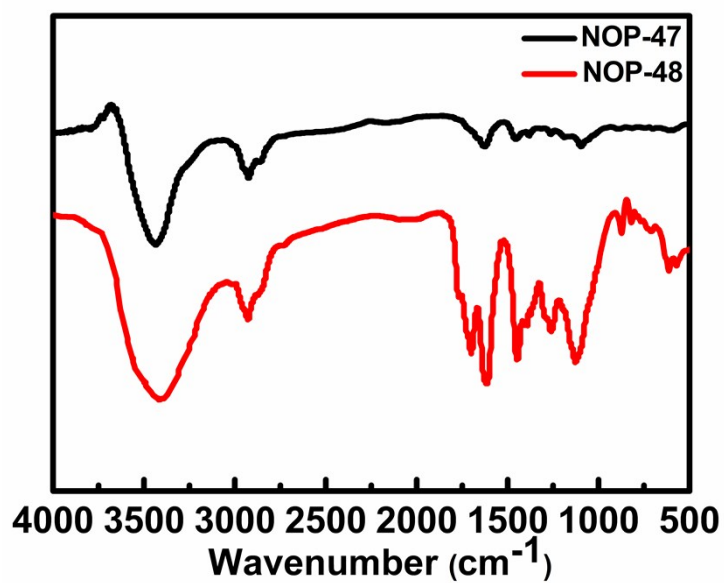

Fig.S1 FTIR spectra of NOPs.

## 2. Elemental analysis

Tab. S1 Elemental analysis data of the polymers

| Polymers | C (%) | H (%) |
|----------|-------|-------|
| NOP-47   | 80.38 | 4.69  |
| NOP-48   | 82.32 | 4.36  |

### 3. Powder X-ray diffraction patterns of NOPs

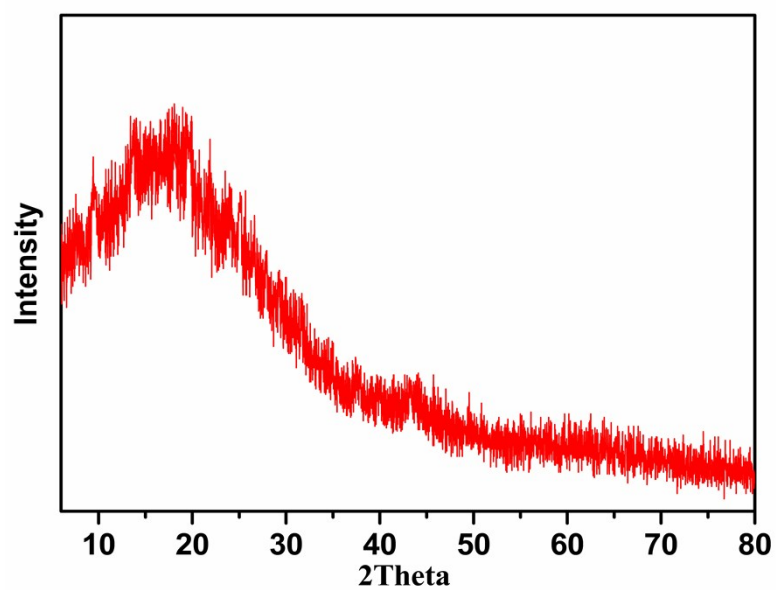

Fig.S2 PXRD spectrum of NOP-47.

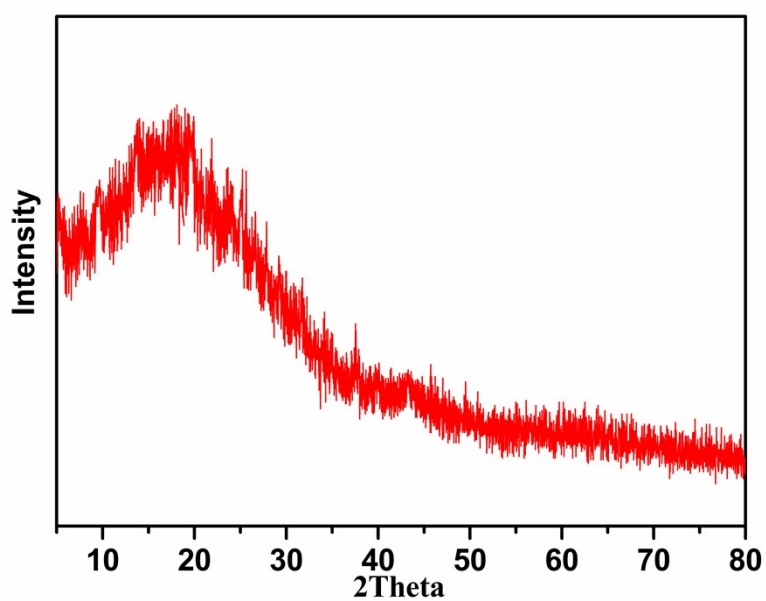

Fig.S3 PXRD spectrum of NOP-48.

#### 4. Morphology analysis of NOP-47

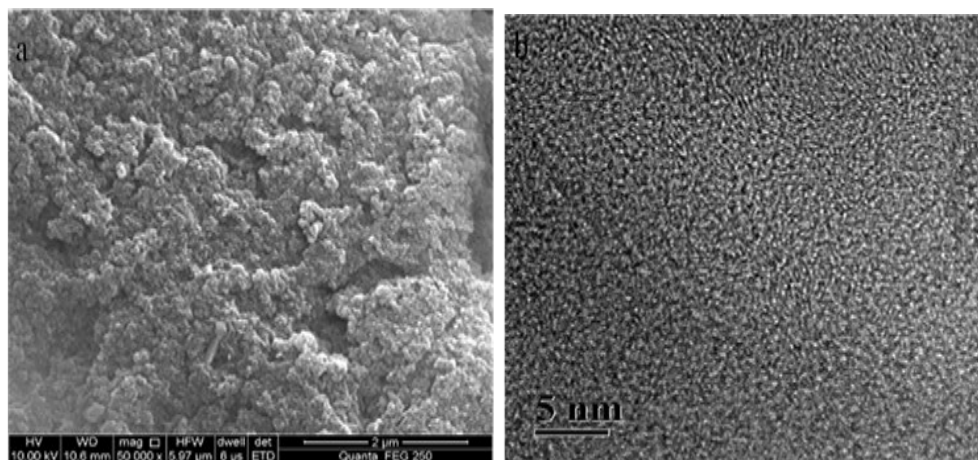

Fig.S4 Typical SEM image (a) and TEM image (b) of NOP-47

#### 5. TGA curves of NOPs

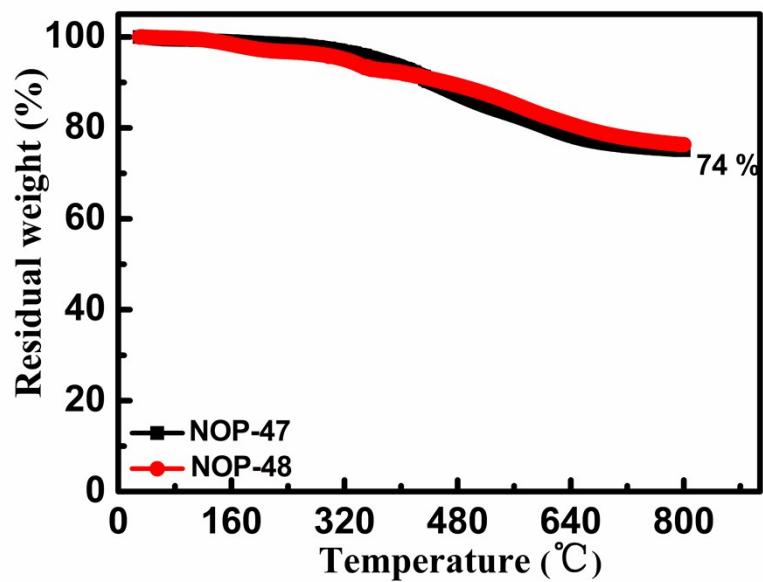

Fig.S5 TGA plots of NOPs under nitrogen atmosphere.

## 6. High-pressure methane adsorption curves for NOPs

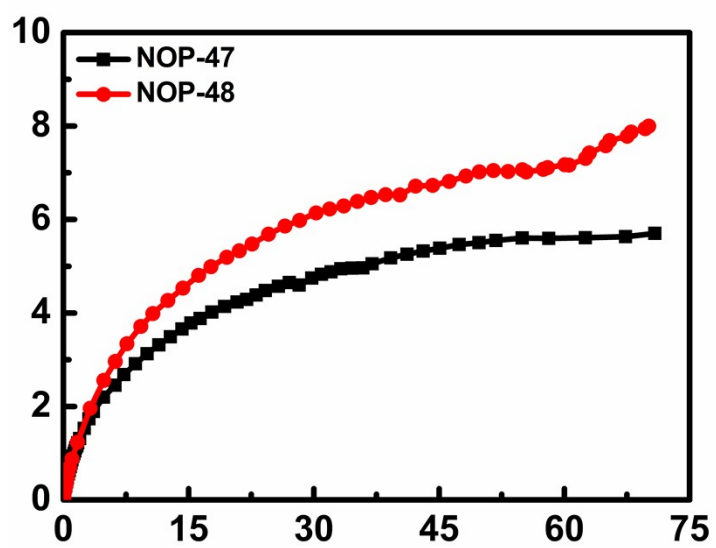

Fig.S6 CH<sub>4</sub> adsorption curves for NOPs at 298 K.

## 7. Selective gas adsorption for NOPs

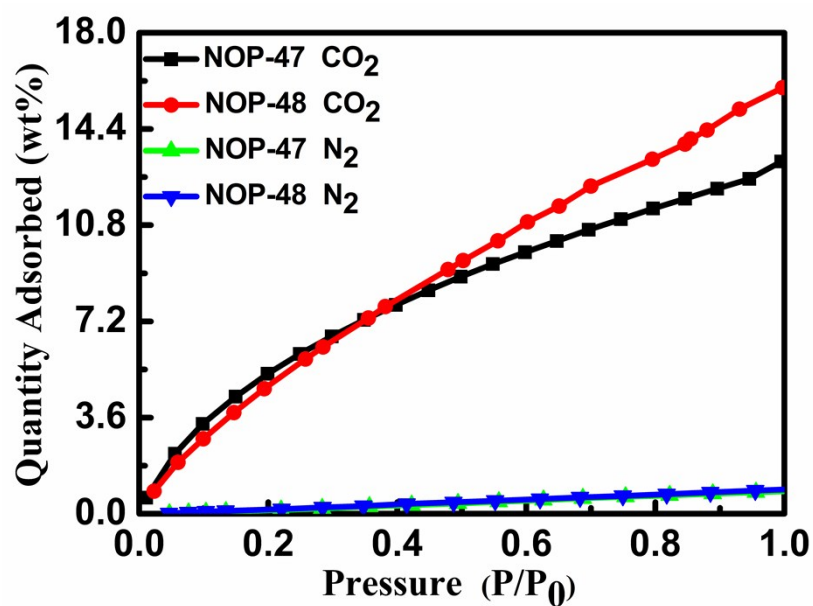

Fig.S7 CO<sub>2</sub> and N<sub>2</sub> adsorption isotherms of NOPs at 298 K.

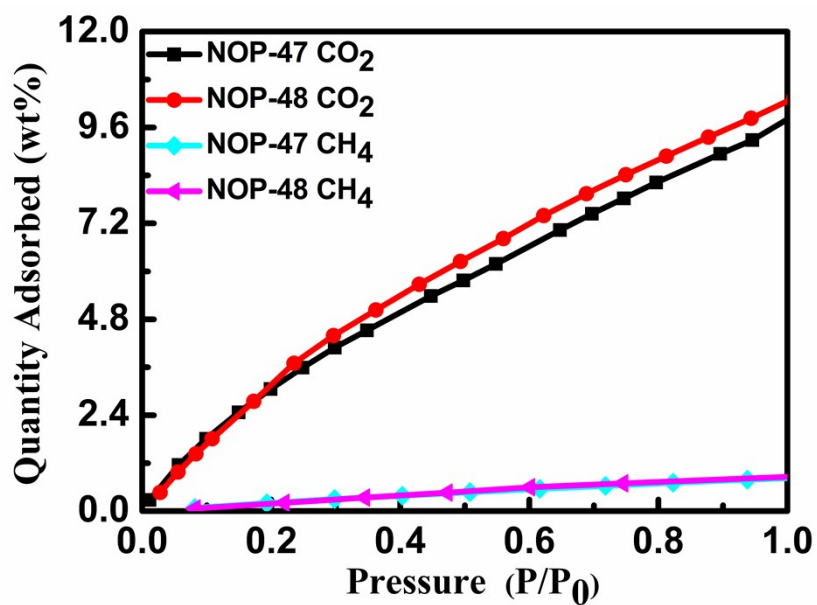

Fig.S8 CO<sub>2</sub> and CH<sub>4</sub> adsorption isotherms of NOPs at 298 K.

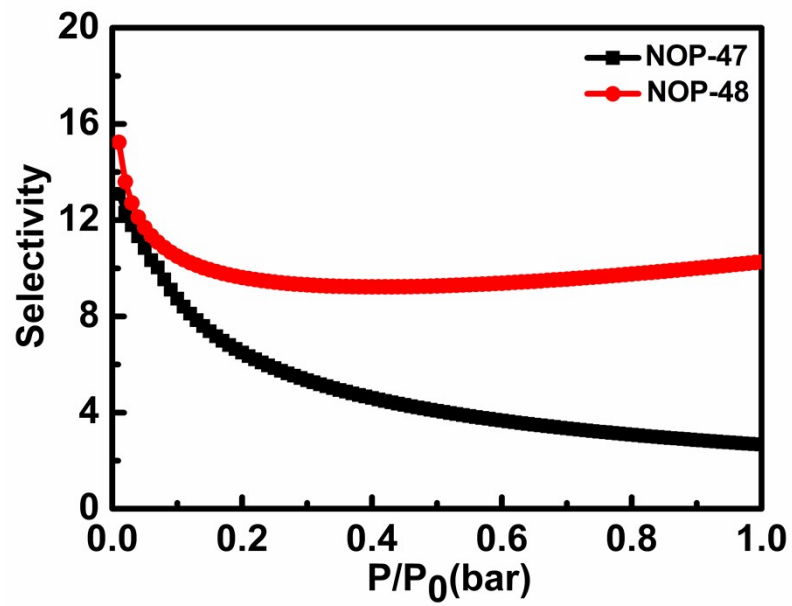

Fig.S9 IAST method for CO<sub>2</sub> over CH<sub>4</sub> selectivities for NOPs at 298 K
